# Supplementary material for: Qingwei San Treats Oral Ulcer Subjected to Stomach Heat Syndrome in db/db Mice by Targeting TLR4/MyD88/NF-κB Pathway
Source: Research Square preprint supplement (doi:10.21203/rs.3.rs-1014975/v1), 2021-11-01
Supplement: Supplementary file 2 [file de536b6c620e806f9c69e4af.xlsx]

## Sheet: 汇总成分
Name	Formula	CAS_num	Class	Error PPM	Annotation MW	Calc. MW	Retention time/min	Model	Major MS/MS fragments
2-(1H-Benzimidazol-2-yl)-3,4,5,6-tetrachlorobenzohydrazide	C14 H8 Cl4 N4 O	NA	Benzimidazoles	3.66	387.945	387.947	0.677	-	388.93665, 211.27515, 211.28201, 158.97752, 130.98257
2-(4-Bromobenzyl)-3-sulfanylpropanoic acid	C10 H11 Br O2 S	NA	Others	-0.22	273.966	273.966	0.68	-	272.9589, 130.98262, 158.97760
2,6-Dichlorotoluene	C7 H6 Cl2	118-69-4	Benzene and substituted derivatives	1.73	159.985	159.985	0.685	-	158.97768, 102.98768, 130.98260
L-Arginine	C6 H14 N4 O2	74-79-3	Carboxylic acids and derivatives	-4.64	174.112	174.111	0.724	-	173.1035, 131.08162
DL-Arginine	C6 H14 N4 O2	7200-25-1	Carboxylic acids and derivatives	-0.5	174.112	174.112	0.73	+	175.11877, 116.07071, 70.06573, 60.05630
2-Ethyl-N-{(2S)-4-[(3-{[(4-fluorophenyl)sulfonyl]amino}propyl)amino]-3,4-dioxo-1-phenyl-2-butanyl}-3,4,7,8-tetrahydro-2H-[1,4]dioxino[2,3-g][1,2]benzothiazine-3-carboxamide 1,1-dioxide	C32 H35 F N4 O9 S2	NA	Others	4.38	702.183	702.186	0.742	+	703.194
D-(+)-Proline	C5 H9 N O2	344-25-2	Carboxylic acids and derivatives	1.57	115.063	115.064	0.749	+	116.07076, 70.05577
alpha-D-Glucopyranosyl-(1->4)-alpha-D-glucopyranosyl-(1->4)-alpha-D-glucopyranosyl-(1->4)-D-glucopyranose	C24 H42 O21	34612-38-9	Organooxygen compounds	0.85	666.222	666.222	0.755	-	701.19196, 711.2204
Choline	C5 H13 N O	62-49-7	Organonitrogen compounds	2.65	103.1	103.1	0.756	+	104.10726, 60.08145
N-Hydroxysuccinimide	C4 H5 N O3	6066-82-6	Pyrrolidines	-0.18	115.027	115.027	0.761	+	113.06073, 116.07076, 70.05577, 88.14787
2-cyano-N-(2-morpholinoethyl)acetamide	C9 H15 N3 O2	15029-26-2	Oxazinanes	-0.93	197.116	197.116	0.763	+	198.12352, 95.06075, 154.13376, 198.12357
4-AMINOBUTANOATE	C4 H9 N O2	56-12-2	Carboxylic acids and derivatives	2.86	103.063	103.064	0.764	+	104.10725, 60.08150
Maltotriose	C18 H32 O16	1109-28-0	Organooxygen compounds	-0.73	504.169	504.169	0.765	+	543.13165, 203.47693, 377.48819
DA9185000	C12 H10 O S	NA	Others	-0.53	202.045	202.045	0.766	+	203.05241, 91.50411
Bis(2,2-dihydroxyethyl) hydrogen phosphate	C4 H11 O8 P	NA	Others	-0.38	218.019	218.019	0.766	+	219.02635, 61.19236, 76.617
2-C-methylerythritol 4-phosphate	C5 H13 O7 P	206440-72-4	Organic phosphoric acids and derivatives	-1.42	216.04	216.04	0.767	-	215.0323, 59.01273, 89.0234, 71.01277
D-Raffinose	C18 H32 O16	512-69-6	Organooxygen compounds	0.06	504.169	504.169	0.771	-	539.13849, 59.01274, 71.01277, 89.02336
Boc-Asp-OH	C9 H15 N O6	13726-67-5	Carboxylic acids and derivatives	-1.34	233.09	233.09	0.772	+	266.12311, 248.11253, 230.10207
Azidocillin	C16 H17 N5 O4 S	17243-38-8	Lactams	3.3	375.1	375.101	0.782	-	374.094
2-{[(4-Chlorophenyl)carbamoyl]amino}-6-ethyl-4,5,6,7-tetrahydrothieno[2,3-c]pyridine-3-carboxamide	C17 H19 Cl N4 O2 S	NA	Benzene and substituted derivatives	3.29	378.092	378.093	0.785	-	377.08578, 371.71332, 89.02340, 59.01275, 71.01276, 211.63399
Allysine (not validated)	C6 H11 N O3	1962-83-0	Carboxylic acids and derivatives	-0.68	145.074	145.074	0.787	+	146.08104, 82.06564, 100.07600
Betaine	C5 H11 N O2	107-43-7	Carboxylic acids and derivatives	1.03	117.079	117.079	0.788	+	144.10184, 84.08125, 144.10178
1-Deoxy-1-{2,6,8-trioxo-7-[3-(phosphonooxy)propyl]-1,2,3,6,7,8-hexahydro-9H-purin-9-yl}-D-ribitol	C13 H21 N4 O11 P	NA	Imidazopyrimidines	-3.56	440.094	440.093	0.796	-	439.08560, 96.96857
N6-(2,4-Dinitrophenyl)-L-lysine	C12 H16 N4 O6	1094-76-4	Benzene and substituted derivatives	-3.87	312.107	312.106	0.798	-	683.22546, 59.01271, 89.02332, 71.01275
(2E,6E)-8-Anilino-3,7-dimethyl-2,6-octadien-1-yl trihydrogen diphosphate	C16 H25 N O7 P2	NA	Others	2.88	405.111	405.112	0.799	-	404.10455, 61.98725
alpha-L-Araf-(1->3)-beta-D-Galp-(1->6)-D-Galp	C17 H30 O15	NA	Organooxygen compounds	-0.06	474.158	474.158	0.802	-	533.1723, 216.28969
(1S,3R,4S,5R)-1,3,4,5-tetrahydroxycyclohexane-1-carboxylic acid	C7 H12 O6	77-95-2	Organooxygen compounds	-3.46	192.063	192.063	0.806	-	191.05542, 85.02846
Sucrose	C12 H22 O11	57-50-1	Organooxygen compounds	-0.45	342.116	342.116	0.808	-/+	387.11435, 341.10873, 377.08557
Methyl isonicotinate	C7 H7 N O2	2459-09-8	Pyridines and derivatives	-0.5	137.048	137.048	0.809	+	138.05484, 110.06023
D-(+)-Pipecolinic acid	C6 H11 N O2	1723-00-8	Carboxylic acids and derivatives	0.48	129.079	129.079	0.817	+	130.08621, 84.08126
4-Hydroxy-1-(2-hydroxyethyl)-2,2,6,6-tetramethylpiperidine	C11 H23 N O2	52722-86-8	Piperidines	-0.66	201.173	201.173	0.82	+	202.17987, 102.09160
Argininosuccinic acid	C10 H18 N4 O6	2387-71-5	Carboxylic acids and derivatives	-1.25	290.123	290.122	0.824	+	291.12955, 175.11887
N-(2-AMINOETHYL)ETHYLENEUREA	C5 H11 N3 O	6281-42-1	Azolidines	0.09	129.09	129.09	0.826	+	130.09749, 84.08128, 70.06577
Adenine	C5 H5 N5	73-24-5	Imidazopyrimidines	0.91	135.054	135.055	0.827	+	136.06171, 119.04930
4-Guanidinobutyric acid	C5 H11 N3 O2	463-00-3	Carboxylic acids and derivatives	-0.39	145.085	145.085	0.83	+	146.09230, 87.04452, 86.06052
N-[3-(4,4-Dimethyl-2,5-dioxo-1-imidazolidinyl)-2-hydroxypropyl]-4-methyl-N-(3-nitrophenyl)benzenesulfonamide	C21 H24 N4 O7 S	NA	Others	2.07	476.137	476.138	0.839	-	475.13028, 133.01321
N-(4-Sulfamoylphenyl)-2-(3,4,5-trimethoxybenzoyl)hydrazinecarbothioamide	C17 H20 N4 O6 S2	NA	Others	2.6	440.082	440.084	0.886	-	439.07651, 96.96857
Nicotinic acid	C6 H5 N O2	59-67-6	Pyridines and derivatives	0.82	123.032	123.032	0.912	+	124.03938, 80.05002, 112.03950
N-Acetylhistamine	C7 H11 N3 O	673-49-4	Carboxylic acids and derivatives	-0.5	153.09	153.09	1.112	+	154.09735, 95.04951
L-beta-homoproline-HCl	C6 H11 N O2	NA	Others	1.2	129.079	129.079	1.12	+	130.09747, 70.06577, 71.04976, 84.08126
Nicotinamide	C6 H6 N2 O	98-92-0	Pyridines and derivatives	0.89	122.048	122.048	1.121	+	123.05537, 80.05003
Citric acid	C6 H8 O7	77-92-9	Carboxylic acids and derivatives	-3.37	192.027	192.026	1.124	-	191.01909, 111.00772, 87.00772, 85.02847
3-(2,6-Dioxocyclohexyl)propanenitrile	C9 H11 N O2	1874-85-7	Organooxygen compounds	-0.49	165.079	165.079	1.124	+	166.08612, 137.05962, 149.05962
Shikimic acid	C7 H10 O5	138-59-0	Organooxygen compounds	-4.13	174.053	174.052	1.126	-	219.05058, 73.02841, 93.03353, 111.00776, 131.08167
Uracil	C4 H4 N2 O2	66-22-8	Diazines	1.7	112.027	112.027	1.129	+	113.03474, 96.00837, 70.02938
L-Pyroglutamic acid	C5 H7 N O3	98-79-3	Carboxylic acids and derivatives	0.45	129.043	129.043	1.129	+	130.04987, 84.04490
Uridine	C9 H12 N2 O6	58-96-8	Pyrimidine nucleosides	-0.9	244.07	244.069	1.137	-	243.06201, 110.02370
N-Fructosyl tyrosine	C15 H21 N O8	NA	Carboxylic acids and derivatives	-1.37	343.127	343.126	1.148	+	344.13361, 326.12271
Catalpol	C15 H22 O10	2415-24-9	Organooxygen compounds	0.17	362.121	362.121	1.155	-	407.11957, 97.02846, 85.02846, 71.01276
cis-Aconitic acid	C6 H6 O6	585-84-2	Carboxylic acids and derivatives	-4.68	174.016	174.016	1.156	-	173.67682, 85.02846, 111.00775
DL-4-Hydroxyphenyllactic acid	C9 H10 O4	306-23-0	Phenylpropanoic acids	-0.25	182.058	182.058	1.16	-/+	165.05452, 183.06506, 147.04391, 109.06500, 137.05960
p-Coumaric acid	C9 H8 O3	7400-08-0	Cinnamic acids and derivatives	-0.07	164.047	164.047	1.161	+	165.05453, 91.05466, 119.04927, 81.07042, 137.05963
Ethyl 3-(1,3-dioxolan-2-ylmethyl)-4,5-dihydro-1,2-oxazole-5-carboxylate	C10 H15 N O5	NA	Others	-0.68	229.095	229.095	1.184	+	194.08093, 230.10191, 98.06033, 86.06047, 212.09137
Adenosine	C10 H13 N5 O4	58-61-7	Purine nucleosides	-1.28	267.097	267.096	1.195	+	268.10367, 136.06166
L-Tyrosine	C9 H11 N O3	60-18-4	Carboxylic acids and derivatives	-0.38	181.074	181.074	1.21	+	182.09233, 136.07558, 165.05446
N-Fructosyl isoleucine	C12 H23 N O7	NA	Carboxylic acids and derivatives	-1.5	293.147	293.147	1.274	+	294.15424, 276.14371, 230.13837
Guanosine	C10 H13 N5 O5	118-00-3	Purine nucleosides	0.18	283.092	283.092	1.287	-	282.08444, 150.04120, 212.96095
Guanine	C5 H5 N5 O	73-40-5	Imidazopyrimidines	-0.3	151.049	151.049	1.3	+	152.05656, 153.04053
Crotonoside	C10 H13 N5 O5	1818-71-9	Purine nucleosides	-1.21	283.092	283.091	1.3	+	284.09860, 152.05655
L-Isoleucine	C6 H13 N O2	73-32-5	Carboxylic acids and derivatives	0.3	131.095	131.095	1.345	+	132.10194, 86.09690, 90.90366, 149.94026
Prolylleucine	C11 H20 N2 O3	52899-07-7	Carboxylic acids and derivatives	-0.65	228.147	228.147	1.381	+	229.15450, 181.09695
Pyridoxine	C8 H11 N O3	65-23-6	Pyridines and derivatives	-0.59	169.074	169.074	1.461	+	170.08089, 152.07043, 81.07039
2-Furoic acid	C5 H4 O3	88-14-2	Furans	2.27	112.016	112.016	1.494	+	113.02346, 71.94083
Gallic acid	C7 H6 O5	149-91-7	Benzene and substituted derivatives	-4.73	170.022	170.021	1.705	-/+	169.01346, 125.02341, 81.03354
L-Phenylalanine	C9 H11 N O2	63-91-2	Carboxylic acids and derivatives	-0.35	165.079	165.079	2.219	+	120.08089, 166.04974
(3E)-3-(2-Furoylhydrazono)-N-(4-methoxy-2-nitrophenyl)butanamide	C16 H16 N4 O6	NA	Others	-3.65	360.107	360.106	2.459	-	359.09842, 72.99203
Resorcinol monoacetate	C8 H8 O3	102-29-4	Phenol esters	-0.48	152.047	152.047	2.606	+	153.05447, 124.05193
Benzoic acid + 2O, O-Hex	C13 H16 O9	NA	Organooxygen compounds	0.82	316.079	316.08	2.68	-	315.07227, 153.01840, 109.02847
Pantothenic acid	C9 H17 N O5	79-83-4	Organooxygen compounds	-1.89	219.111	219.11	2.723	-	218.10295, 88.03935, 213.12546
Danshensu	C9 H10 O5	76822-21-4	Phenylpropanoic acids	-3.09	198.053	198.052	2.9	-	197.04494, 72.99206, 135.04410
Piscidic Acid	C11 H12 O7	NA	Others	-0.72	256.058	256.058	3.222	-	255.05084, 72.99204
Codeine	C18 H21 N O3	76-57-3	Morphinans	-1.11	299.152	299.152	4.426	+	300.15906, 133.08592
Bioside	C20 H30 O12	12634-05-8	Organooxygen compounds	0.65	462.174	462.174	4.461	-	461.16675, 59.0127, 71.01273
Indole	C8 H7 N	120-72-9	Indoles and derivatives	1.01	117.058	117.058	4.47	+	118.06525, 76.93354, 94.94390
DL-Tryptophan	C11 H12 N2 O2	54-12-6	Indoles and derivatives	-3.09	204.09	204.089	4.475	-	203.082, 74.02367, 72.00802, 116.04956
Caffeic acid hexoside	C15 H18 O9	NA	Cinnamic acids and derivatives	-0.18	342.095	342.095	4.477	-	341.08774, 135.0442, 212.46013
trans-3-Indoleacrylic acid	C11 H9 N O2	1204-06-4	Indoles and derivatives	-0.78	187.063	187.063	4.49	+	146.05992, 188.07042
PEG n6	C12 H26 O7	2615-15-8	Organooxygen compounds	-1.43	282.168	282.167	4.5	+	283.17474, 89.06018, 133.08592
4-Indolecarbaldehyde	C9 H7 N O	1047-86-6	Indoles and derivatives	-0.6	145.053	145.053	4.512	+	118.06525, 146.05997
(1S,4aS,7S,7aS)-7-hydroxy-7-methyl-1-[(2S,3R,4S,5S,6R)-3,4,5-trihydroxy-6-(hydroxymethyl)oxan-2-yl]oxy-4a,5,6,7a-tetrahydro-1H-cyclopenta[c]pyran-4-carboxylic acid	C16 H24 O10	NA	Prenol lipids	0.48	376.137	376.137	4.521	-	375.12985, 69.03350
rhodioloside	C14 H20 O7	10338-51-9	Organooxygen compounds	0.28	300.121	300.121	4.649	-	50.01272, 71.01278, 89.02335
2-Benzo[b]furan-2-yl-3-(4-fluorophenyl)-1,3-thiazolan-4-one	C17 H12 F N O2 S	NA	Benzofurans	3.28	313.057	313.058	4.796	+	314.06558, 270.07587
Geniposidic acid	C16 H22 O10	27741-01-1	Prenol lipids	0.47	374.121	374.121	4.867	-	373.11420, 123.04417
[4,5,8-trihydroxy-5-(hydroxymethyl)-3-(3-methoxy-3-oxoprop-1-en-2-yl)-8a-methyl-1,2,3,4,4a,6,7,8-octahydronaphthalen-2-yl] 3,4-dihydroxy-2-methylidenebutanoate	C21 H32 O10	NA	Prenol lipids	0.47	444.2	444.2	4.91	-	443.19250, 59.01278, 71.01279
2-Isopropylmalic acid	C7 H12 O5	3237-44-3	Fatty Acyls	-4.64	176.068	176.068	5.03	-	175.06041, 85.06487, 115.03908
1'-(2-Oxo-2-{[2-(phenylsulfanyl)phenyl]amino}ethyl)-1,4'-bipiperidine-4'-carboxamide	C25 H32 N4 O2 S	NA	Carboxylic acids and derivatives	2.69	452.225	452.226	5.041	-	451.2187, 210.87877, 59.01271, 71.01279
(2R,3S,4S,5R,6R)-5-[(2S,3R,4R)-3,4-dihydroxy-4-(hydroxymethyl)oxolan-2-yl]oxy-2-(hydroxymethyl)-6-[2-(4-hydroxyphenyl)ethoxy]oxane-3,4-diol	C19 H28 O11	149596-95-2	Organooxygen compounds	-0.05	432.163	432.163	5.046	-	431.15582, 59.01271, 71.01277, 89.02332
trans-Ferulic acid	C10 H10 O4	NA	Others	-1.04	194.058	194.058	5.061	+	177.05446, 145.02823
Oxypaeoniflorin	C23 H28 O12	39011-91-1	Prenol lipids	0.51	496.158	496.158	5.165	-	495.15109, 137.02339, 93.03351, 71.01275, 211.21074
Coniferaldehyde	C10 H10 O3	458-36-6	Phenols	-1.37	178.063	178.063	5.168	+	179.0701, 133.06473, 151.07523
Chlorogenic acid	C16 H18 O9	327-97-9	Organooxygen compounds	0.29	354.095	354.095	5.206	-/+	353.08786, 302.73059, 191.05540, 90.18726, 116.87040
(-)-Epicatechin	C15 H14 O6	490-46-0	Flavonoids	-1.19	290.079	290.079	5.29	+	291.08597, 139.03885, 123.04409, 165.05449
Ethylmorphine	C19 H23 N O3	76-58-4	Morphinans	-1.43	313.168	313.167	5.298	+	314.17450, 58.06585
PEG n7	C14 H30 O8	NA	Organooxygen compounds	-1.78	326.194	326.193	5.352	+	327.20093, 89.06017, 133.08591
7-Hydroxycoumarine	C9 H6 O3	93-35-6	Coumarins and derivatives	-1.12	162.032	162.032	5.36	+	163.03874, 135.04393, 145.02823
2,3,4,9-Tetrahydro-1H-β-carboline-3-carboxylic acid	C12 H12 N2 O2	42438-90-4	Indoles and derivatives	-1.08	216.09	216.09	5.389	+	217.09694, 144.08061
Methyl chlorogenate	C17 H20 O9	123483-19-2	Organooxygen compounds	-0.23	368.111	368.111	5.391	-	367.10336, 134.0360, 212.97038
2-Naphthylamine	C10 H9 N	91-59-8	Naphthalenes	-0.79	143.073	143.073	5.391	+	144.08063, 143.07281
[(1aS,1bS,5S,5aS,6S)-6-hydroxy-6-(hydroxymethyl)-2-[[(2R,3R,4S,5S,6R)-3,4,5-trihydroxy-6-(hydroxymethyl)oxan-2-yl]oxymethyl]-1b,5,5a,6a-tetrahydro-1aH-oxireno[3,4]cyclopenta[1,3-d]pyran-5-yl] 3-methylbutanoate	C21 H32 O12	NA	Organooxygen compounds	0.64	476.189	476.19	5.535	-	475.18240, 59.01274, 71.01276
3,4-Dihydroxyphenylacetic acid	C8 H8 O4	102-32-9	Phenols	-4.96	168.042	168.041	5.571	-	167.03415, 123.04413, 60.86900
2,3-Dihydro-1,4-benzodioxine-5-carboxylic acid	C9 H8 O4	4442-53-9	Benzodioxanes	-4.06	180.042	180.042	5.67	-	179.03426, 135.04414, 59.01271
Methoxytyrosine	C10 H13 N O4	7636-26-2	Carboxylic acids and derivatives	-2.6	211.084	211.084	5.744	-	210.07663, 124.03941, 94.02879
17-(Cyclopropylmethyl)-3,14-dihydroxy-4,5-epoxymorphinan-6-one	C20 H23 N O4	NA	Phenanthrenes and derivatives	-0.23	341.163	341.163	5.814	-	386.16092, 212.41908, 279.70404, 212.41249
Paeonolide	C20 H28 O12	72520-92-4	Organooxygen compounds	0.3	460.158	460.158	5.817	-	431.09833, 505.1564, 59.01272, 71.01273, 89.12334
6-Acetylcodeine	C20 H23 N O4	6703-27-1	Morphinans	-2.06	341.163	341.162	5.819	+	342.16928, 297.11154, 265.08539
Coumaroyl quinic acid (isomer of 758, 760)	C16 H18 O8	NA	Organooxygen compounds	0.31	338.1	338.1	5.857	-	337.09293, 93.03353, 87.00773
Nalorphine	C19 H21 N O3	62-67-9	Morphinans	-2.24	311.152	311.151	5.859	+	312.15875, 107.04934
Prim-O-glucosylcimifugin	C22 H28 O11	NA	Others	-1.49	468.163	468.162	6.1	+	469.16974, 307.117
3-Chlor-6-hydrazinylpyridazin	C4 H5 Cl N4	NA	Others	4.72	144.02	144.021	6.102	+	177.05443, 117.0336, 89.03899
(3R,5R)-1,3,5-Trihydroxy-4-{[(2E)-3-(4-hydroxy-3-methoxyphenyl)-2-propenoyl]oxy}cyclohexanecarboxylic acid	C17 H20 O9	NA	Others	-0.19	368.111	368.111	6.104	-/+	369.11734, 177.05444
Quinic acid	C7 H12 O6	77-95-2	Organooxygen compounds	-4.16	192.063	192.063	6.106	-	525.16156, 121.0285
Paeoniflorin	C23 H28 O11	23180-57-6	Prenol lipids	0.43	480.163	480.163	6.183	-	525.16156, 121.02850, 71.01277
4-Chloro-N-(4-ethoxyphenyl)-N-{2-[4-(2-methoxyphenyl)-1-piperazinyl]-2-oxoethyl}benzenesulfonamide	C27 H30 Cl N3 O5 S	NA	Diazinanes	-1.41	543.159	543.159	6.183	-	542.15143, 61.98727, 119.93566
2,4-Dimethylbenzaldehyde	C9 H10 O	15764-16-6	Benzene and substituted derivatives	-0.8	134.073	134.073	6.183	+	135.08037, 79.05477, 91.05464, 107.08577
Mellein	C10 H10 O3	17397-85-2	Benzopyrans	-1.39	178.063	178.063	6.184	+	179.07002, 151.07527, 133.06477, 105.07015, 79.05479
L-Glutathione (reduced)	C10 H17 N3 O6 S	70-18-8	Carboxylic acids and derivatives	0.24	307.084	307.084	6.217	+	308.09116, 134.60739
Papaverine	C20 H21 N O4	58-74-2	Isoquinolines and derivatives	-1.01	339.147	339.147	6.42	+	340.15378, 325.13031, 324.12247
N-Acetyl-L-phenylalanine	C11 H13 N O3	2018-61-3	Carboxylic acids and derivatives	-2.56	207.09	207.089	6.478	-	206.08174, 58.02872, 70.02876
[(2R,3R,4S,5R,6R)-6-[2-(3,4-dihydroxyphenyl)ethoxy]-3,5-dihydroxy-4-[(3R,4R,5R,6S)-3,4,5-trihydroxy-6-methyloxan-2-yl]oxyoxan-2-yl]methyl (E)-3-(3,4-dihydroxyphenyl)prop-2-enoate	C29 H36 O15	NA	Cinnamic acids and derivatives	0.74	624.205	624.206	6.605	-	623.19861, 71.01273, 113.02336, 161.02336
Berberrubine	C19 H15 N O4	15401-69-1	Protoberberine alkaloids and derivatives	-1.69	321.1	321.1	6.834	+	322.10678, 307.08328
Scopoletin	C10 H8 O4	92-61-5	Coumarins and derivatives	-1.02	192.042	192.042	6.847	+	193.04941, 149.02324
Ferulic acid	C10 H10 O4	NA	Cinnamic acids and derivatives	-1.26	194.058	194.058	6.859	+	177.05449, 145.02831, 163.03882
5-Hydroxyindole-3-acetic acid	C10 H9 N O3	1321-73-9	Indoles and derivatives	-0.87	191.058	191.058	6.913	+	192.06528, 149.05950
Aderbasib	C21 H28 N4 O5	791828-58-5	Diazinanes	-2.55	416.206	416.205	6.948	-	415.19766, 59.01274, 71.01279, 211.59348
Dehydroglaucine	C21 H23 N O4	NA	Others	-2.17	353.163	353.162	7.026	+	354.16916, 339.14581, 338.13791
Caffeic acid	C9 H8 O4	331-39-5	Cinnamic acids and derivatives	-0.64	180.042	180.042	7.139	+	163.03880, 135.04399
Ethyl protocatechuate	C9 H10 O4	3943-89-3	Benzene and substituted derivatives	-0.25	182.058	182.058	7.203	+	183.06506, 141.054490, 159.96906
Jatrorrhizine	C20 H19 N O4	3621-38-3	Protoberberine alkaloids and derivatives	-3.02	337.131	337.13	7.399	+	338.13806, 323.11468, 337.12589
Azelaic acid	C9 H16 O4	123-99-9	Fatty Acyls	-3.44	188.105	188.104	7.462	-	187.09694, 125.09624, 57.03348
Maritimein	C21 H20 O11	490-54-0	Flavonoids	0.16	448.101	448.101	7.525	-	447.09335, 72.99208, 215.60956, 109.02840
7-Hydroxy-4-methylcoumarin	C10 H8 O3	90-33-5	Coumarins and derivatives	-4.75	176.047	176.047	7.699	-	175.03923, 146.96022
Isoferulic acid	C10 H10 O4	537-73-5	Cinnamic acids and derivatives	-3.32	194.058	194.057	7.808	-/+	193.0499, 134.03632, 61.98726
Sulfurein	C21 H20 O10	NA	Flavonoids	-0.09	432.106	432.106	8.083	-	217.09477, 165.05473, 93.03360, 58.00494
3-(3-Nitrophenyl)-2'-acrylonaphthone	C19 H13 N O3	NA	Linear 1,3-diarylpropanoids	-2.38	303.09	303.089	8.203	+	336.122
3,4-Dimethoxycinnamic acid	C11 H12 O4	2316-26-9	Cinnamic acids and derivatives	-0.99	208.074	208.073	8.212	+	191.07013, 184.30939
2-[3,8-Dihydroxy-8-(hydroxymethyl)-3-methyl-2-oxodecahydro-5-azulenyl]-2-propanyl hexopyranoside	C21 H36 O10	NA	Prenol lipids	0.67	448.231	448.231	8.327	-	493.22937, 59.01270, 89.02333, 71.01276
Feruloyl tyramine	C18 H19 N O4	NA	Cinnamic acids and derivatives	-2.18	313.131	313.131	8.334	+	177.05449, 314.13812, 121.06487
Sebacic acid	C10 H18 O4	111-20-6	Fatty Acyls	-2.86	202.121	202.12	8.648	-	201.11266, 139.11188, 57.03347, 88.98703
2-O-methyl 4a-O-[(2S,3R,4S,5S,6R)-3,4,5-trihydroxy-6-(hydroxymethyl)oxan-2-yl] (2S,4aR,6aS,6bR,9R,10R,11S,12aR,14bS)-11-hydroxy-9-(hydroxymethyl)-2,6a,6b,9,12a-pentamethyl-10-[(2S,3R,4S,5R)-3,4,5-trihydroxyoxan-2-yl]oxy-1,3,4,5,6,6a,7,8,8a,10,11,12,13,14b-tetradecahydropicene-2,4a-dicarboxylate	C42 H66 O16	NA	Prenol lipids	1.9	826.435	826.437	9.171	-	825.42938, 71.01275, 89.02333
7-Methoxy-4-methylcoumarin	C11 H10 O3	2555-28-4	Coumarins and derivatives	-0.82	190.063	190.063	9.22	+	191.07005, 163.07518, 148.05168
Ferulaldehyde	C10 H10 O3	20649-42-7	Phenols	-1.35	178.063	178.063	9.341	+	179.07005, 151.07520, 105.07011, 133.06471
[(1S,3R,5R,6S,8S)-3-{[(2S,3R,4S,5S,6R)-6-[(benzoyloxy)methyl]-3,4,5-trihydroxyoxan-2-yl]oxy}-6-hydroxy-8-methyl-9,10-dioxatetracyclo[4.3.1.0?,?.0?,?]decan-2-yl]methyl benzoate	C30 H32 O12	NA	Others	1.05	584.189	584.19	9.343	-	629.18817, 121.0285
(2R,3R,4R,6aR,6bS,8aR,14bR)-2,3,12-trihydroxy-4,6a,6b,11,11,14b-hexamethyl-8a-[(2S,3R,4S,5S,6R)-3,4,5-trihydroxy-6-(hydroxymethyl)oxan-2-yl]oxycarbonyl-1,2,3,4a,5,6,7,8,9,10,12,12a,14,14a-tetradecahydropicene-4-carboxylic acid	C36 H56 O12	NA	Prenol lipids	1.04	680.377	680.378	9.469	-	679.3703, 59.01271
Visnagin	C13 H10 O4	82-57-5	Benzopyrans	-0.99	230.058	230.058	9.475	+	231.06493, 216.04150
4-Methylumbelliferone	C10 H8 O3	90-33-5	Coumarins and derivatives	-1.01	176.047	176.047	9.497	+	177.05450, 145.02832, 163.03883, 149.05963
N-{1-[3-(Dimethylamino)propyl]-1H-benzimidazol-2-yl}cyclohexanecarboxamide	C19 H28 N4 O	NA	Others	-4.3	328.226	328.225	9.531	-	327.21771, 85.02845
Sedanolide	C12 H18 O2	6415-59-4	Isobenzofurans	-1.07	194.131	194.13	9.537	+	195.13780, 135.11676, 81.07040, 177.12726
9S,13R-12-Oxophytodienoic acid	C18 H28 O3	NA	Fatty Acyls	-1.45	292.204	292.203	9.554	+	293.21045, 275.20023, 149.09605, 219.17413, 107.08578
Alisol C 23-acetate	C32 H48 O6	26575-93-9	Prenol lipids	-1.14	528.345	528.344	9.583	+	529.35175, 451.32007, 511.34122, 433.30951, 397.27359
Acetyl-11-keto-β-boswellic acid	C32 H48 O5	67416-61-9	Prenol lipids	-0.91	512.35	512.35	9.689	+	513.35724, 212.67044, 513.35681, 435.32446
(-)-pinellic acid	C18 H34 O5	97134-11-7	Fatty Acyls	-0.13	330.241	330.241	9.912	-	329.23331, 212.33778, 99.08050, 139.10168
13(S)-HOTrE	C18 H30 O3	87984-82-5	Fatty Acyls	-1.78	294.219	294.219	9.913	+	277.21570, 295.22632, 111.08062
[(E,6R)-6-hydroxy-6-[(2S,8S,9R,10R,13R,14S,16R)-16-hydroxy-4,4,9,13,14-pentamethyl-3,11-dioxo-2-[(2S,3R,4S,5S,6R)-3,4,5-trihydroxy-6-(hydroxymethyl)oxan-2-yl]oxy-2,7,8,10,12,15,16,17-octahydro-1H-cyclopenta[a]phenanthren-17-yl]-2-methyl-5-oxohept-3-en-2-yl] acetate	C38 H56 O13	NA	Steroids and steroid derivatives	1.68	720.372	720.373	10.273	-	719.40228, 59.01274
N-[(3S,9R,10S)-9-[[[anilino(oxo)methyl]-methylamino]methyl]-12-[(2R)-1-hydroxypropan-2-yl]-3,10-dimethyl-13-oxo-2,8-dioxa-12-azabicyclo[12.4.0]octadeca-1(14),15,17-trien-16-yl]cyclohexanecarboxamide	C36 H52 N4 O6	NA	Macrolactams	-1.14	636.389	636.388	10.367	-	635.38068, 213.04175
NCGC00384869-01!4,4,8,10,14-pentamethyl-17-(4,5,6-trihydroxy-6-methylheptan-2-yl)-2,5,6,7,9,15-hexahydro-1H-cyclopenta[a]phenanthrene-3,16-dione	C30 H46 O5	NA	Prenol lipids	-1.51	486.335	486.334	10.379	+	487.34106, 211.63797, 469.33075, 451.31934
2-Hydroxy-22-(2-hydroxy-2-propanyl)-3,8,8,17,19-pentamethyl-23,24-dioxaheptacyclo[19.2.1.01,18 03,17 04,14 07,12 012,14]tetracos-4-en-9-yl β-D-xylopyranoside	C35 H54 O9	NA	Steroids and steroid derivatives	-1.42	618.377	618.376	10.379	+	619.38318, 451.32004, 469.33075, 73.02902
Acetophenone	C8 H8 O	98-86-2	Organooxygen compounds	-0.34	120.058	120.057	10.422	+	121.06487, 91.05463
2,6-Dimethyl-γ-pyrone	C7 H8 O2	1004-36-0	Pyrans	-0.66	124.052	124.052	10.422	+	125.05962, 110.03638
Apocynin	C9 H10 O3	498-02-2	Organooxygen compounds	-1.76	166.063	166.063	10.423	+	167.07014, 149.05963
18-β-Glycyrrhetinic acid	C30 H46 O4	471-53-4	Prenol lipids	-1.6	470.34	470.339	10.465	+	471.34604, 453.33551
5-O-methyl embelin	C18 H28 O4	56005-10-8	Organooxygen compounds	0.04	308.199	308.199	10.767	-	291.19485, 273.18433, 135.08034
1,3,4,10-Tetrahydro-9(2H)-acridinone	C13 H13 N O	13161-85-8	Quinolines and derivatives	-0.75	199.1	199.1	10.853	+	200.10678, 158.05994
Curcurbitacin Iia	C32 H50 O8	NA	Others	0.16	562.351	562.351	10.913	-	561.34338, 59.01272
1-hexadecyl-2-amino-2-deoxy-sn-glycerol	C19 H41 N O2	136770-76-8	Organonitrogen compounds	-1.7	315.314	315.313	11.489	+	316.32040, 289.41928
27-Deoxyactein	C37 H56 O10	NA	Others	-1.53	660.387	660.386	11.648	+	661.39386, 451.31979, 73.02899
N-[(Benzyloxy)carbonyl]-L-seryl-L-seryl-L-lysyl-(4S)-4-methyl-N-[(2S)-4-methyl-1-oxo-2-pentanyl]-L-norleucinamide	C33 H54 N6 O9	NA	Others	4.94	678.395	678.399	11.654	-	677.3913, 59.01273
Senkyunolide A	C12 H16 O2	63038-10-8	Isobenzofurans	-1.17	192.115	192.115	11.731	+	137.05957, 147.11664, 193.12210
NCGC00385386-01_C37H58O10_(3beta,5xi,9beta,15alpha,23R,24S)-3-(alpha-L-Arabinopyranosyloxy)-15-hydroxy-16-oxo-24,25-epoxy-9,19-cyclolanostan-23-yl acetate	C37 H58 O10	NA	Steroids and steroid derivatives	-1.05	662.403	662.402	11.736	+	645.39905, 107.08576, 435.32513
3-n-Butylphathlide	C12 H14 O2	6066-49-5	Benzofurans	-1.22	190.099	190.099	11.843	+	191.1064, 145.10098, 173.09589, 135.04391
Bis(4-ethylbenzylidene)sorbitol	C24 H30 O6	79072-96-1	Dioxanes	-1.58	414.204	414.204	11.9	+	415.21085, 119.08566
Parthenolide	C15 H20 O3	20554-84-1	Prenol lipids	-1.65	248.141	248.141	12.351	+	249.14816, 93.07028, 111.08065
LPC 18:2	C26 H50 N O7 P	NA	Glycerophospholipids	-1.12	519.332	519.332	12.406	+	520.33917, 104.10724, 184.07317
Valerophenone	C11 H14 O	1009-14-9	Organooxygen compounds	-1.01	162.104	162.104	12.44	+	163.11154, 145.10106, 93.07027
9-HOTrE	C18 H30 O3	NA	Fatty Acyls	0.18	294.219	294.22	12.531	-	293.21219, 212.65102, 121.10108
α-Eleostearic acid	C18 H30 O2	506-23-0	Fatty Acyls	-1.69	278.225	278.224	13.096	+	279.23138, 95.0859, 81.0704, 67.05489, 279.23141
13S-hydroxyoctadecadienoic acid	C18 H32 O3	10219-69-9	Fatty Acyls	0.19	296.235	296.235	13.099	-	295.22794, 59.01279, 216.40932, 237.82024
Phthalic anhydride	C8 H4 O3	85-44-9	Benzofurans	-0.37	148.016	148.016	13.921	+	149.02325, 121.02851
Dodecyl sulfate	C12 H26 O4 S	151-41-7	Organic sulfuric acids and derivatives	-0.19	266.155	266.155	14.738	-	265.14783, 96.95903, 215.68524
Hexadecanamide	C16 H33 N O	629-54-9	Fatty Acyls	-1.63	255.256	255.256	16.363	+	256.06309, 88.07614
2,2'-Methylenebis(4-methyl-6-tert-butylphenol)	C23 H32 O2	119-47-1	Benzene and substituted derivatives	-0.7	340.24	340.24	16.729	-	339.23276, 163.112, 218.22951
Oleamide	C18 H35 N O	301-02-0	Fatty Acyls	-1.29	281.272	281.272	16.87	+	282.27875, 247.24158, 265.25208
Ceratodictyol	C19 H38 O4	NA	Fatty Acyls	-1.71	330.277	330.276	17.021	+	313.27319, 239.23666, 95.08591
Stearamide	C18 H37 N O	124-26-5	Carboximidic acids and derivatives	-1.97	283.288	283.287	18.844	+	284.294
